# Supplementary material for: Comparison of bone texture between normal individuals and patients with Kashin-Beck disease from plain radiographs in knee
Source: PubMed Central journal article supplement (PMC6269488; doi:10.1038/s41598-018-35552-8), 2018-11-30
Supplement: 41598_2018_35552_MOESM1_ESM.pdf [file 41598_2018_35552_MOESM1_ESM.pdf]

## **Comparison of bone texture between normal individuals and patients with Kashin-Beck disease from plain radiographs in knee**

Wenrong Li<sup>1,2</sup> Jukka Hirvasniemi<sup>3</sup> Xiong Guo<sup>2\*</sup> Simo Saarakkala<sup>4</sup> Mikko J. Lammi<sup>2,5</sup>  
Chengjuan Qu<sup>5\*</sup>

<sup>1</sup> Department of medical imaging, the First Affiliated Hospital of Xi'an Jiaotong University, 277 West Yanta Road, Xi'an Shaanxi, 710061, PR China (WR.L.)

<sup>2</sup> School of Public Health, Xi'an Jiaotong University Health Science Center, Xi'an, PR China

<sup>3</sup> Center for Machine Vision and Signal Analysis, Faculty of Information Technology and Electrical Engineering, University of Oulu, Oulu, Finland

<sup>4</sup> Research Unit of Medical Imaging, Physics and Technology, Faculty of Medicine, University of Oulu, Oulu, Finland; Medical Research Center Oulu, Oulu University Hospital and University of Oulu, Oulu, Finland; Department of Diagnostic Radiology, Oulu University Hospital, Oulu, Finland

<sup>5</sup> Department of Integrative Molecular Biology, Umeå University, 90187 Umeå, Sweden

Address correspondence to \*Chengjuan Qu:

[chengjuan.qu@gmail.com](mailto:chengjuan.qu@gmail.com); [chengjuan.qu@umu.se](mailto:chengjuan.qu@umu.se)

**Supplemental Table 1** The clinical and X-ray diagnostic criteria of Kashin-Beck disease (KBD) (WS/T 207-2010).

| Criterion          | KBD                 | Description                                                                                                                                                                                                                                                                                                              |
|--------------------|---------------------|--------------------------------------------------------------------------------------------------------------------------------------------------------------------------------------------------------------------------------------------------------------------------------------------------------------------------|
| Clinical diagnosis | Stage I             | Multiple, symmetrical enlarged finer joints, limited flexion and extension, pain and mild muscle atrophy.                                                                                                                                                                                                                |
|                    | Stage II            | Based on stage I, clinical symptoms aggravated, and appeared shortened fingers.                                                                                                                                                                                                                                          |
|                    | Stage III           | Based on stage II, clinical symptoms aggravated and appeared short limbs and dwarfism.                                                                                                                                                                                                                                   |
| X-ray diagnosis    | Stage I (Mild)      | If have one of the following conditions<br>a). Only metaphyseal lesion, +<br>b). Lesion only in the end of bone, +<br>c). Lesions in both of talus and calcaneus, +                                                                                                                                                      |
|                    | Stage II (Moderate) | If have one of the following conditions<br>a). Only metaphyseal lesion, ++<br>b). Lesion only in the end of bone, ++<br>c). Lesions in both metaphysis and end of bone<br>d). Lesions in both epiphysis and metaphysis<br>e). Lesions in both carpal and end of bone<br>f). Talus lesion, ++                             |
|                    | Stage III (Severe)  | If have one of the following conditions<br>a). Metaphyseal lesion, +++<br>b). Lesion in the end of the bone, +++<br>c). Lesions in metaphysis, end of bone, epiphysis and/or carpal (three out of four locations or in all four)<br>d). Metaphyseal premature closure<br>e). Lesions in both of talus and calcaneus, +++ |

**Supplemental Table 2** Comparison of tibial bone structure-related parameters between osteoarthritis (OA) from previous four studies and Kashin-Beck disease (KBD) in our present study.

| Bone structure-related parameters | Subchondral bone in OA      |           | Subchondral bone in KBD |         | Trabecular bone in OA                       |                              | Trabecular bone in KBD |         |
|-----------------------------------|-----------------------------|-----------|-------------------------|---------|---------------------------------------------|------------------------------|------------------------|---------|
|                                   | Medial                      | Lateral   | Medial                  | Lateral | Medial                                      | Lateral                      | Medial                 | Lateral |
| E <sub>Lap</sub>                  | -** (ref 7);<br>-* (ref 15) | no(ref 7) | +                       | no      | no (ref 7);<br>-* (ref 15)                  | -* (ref 7)                   | +                      | +       |
| E <sub>LBP</sub>                  | +++ (ref 7);<br>+ *(ref 15) | no(ref 7) | -**                     | -**     | +++ (ref 7);<br>+ *(ref 15)                 | +++ (ref 7)                  | -**                    | -**     |
| HI <sub>Mean</sub>                | -* (ref 15)                 |           | +++                     | +++     | -* (ref 15)                                 |                              | +++                    | +++     |
| HI <sub>Perp</sub>                | -** (ref 15)                |           | +++                     | +++     | -* (ref 15)                                 |                              | +++                    | +++     |
| HI <sub>Paral</sub>               | no (ref 15)                 |           | +++                     | +++     | -* (ref 15)                                 |                              | +++                    | +++     |
| FD <sub>Ver</sub>                 | +++ (ref 15)                |           | -**                     | -**     | +* (ref 15)<br>-** (ref 20)<br>-** (ref 21) | -* (ref 20);<br>-** (ref 21) | -**                    | no      |
| FD <sub>Hor</sub>                 | no (ref 15)                 |           | -**                     | -**     | +(ref 15);<br>-* (ref 20);<br>-** (ref 21)  | -* (ref 20);<br>-** (ref 21) | -**                    | -**     |

Osteoarthritis: OA; KBD: Kashin-Beck disease; E<sub>Lap</sub>: entropy of Laplacian-based image; E<sub>LBP</sub>:

entropy of local binary patterns; HI<sub>mean</sub>: homogeneity index for orientation of local patterns;

HI<sub>perp</sub>; HI perpendicularly to the bone trabeculae; HI<sub>paral</sub>: HI parallel to the bone trabeculae;

FD<sub>hor</sub>: fractal dimension of horizontal structures; FD<sub>ver</sub>: fractal dimension of vertical structures.

“-“means decreased compared to control; “+” means increased compared to control; no: no

statistical significance; \*\* stands for p value is less than 0.001, \* represents that p value is less

than 0.05. ref 7: reference Hirvasniemi et al. 2014; ref 15: reference Hirvasniemi et al. 2017;

ref 20: Podsiadlo et al. 2008; ref 21: Wolski et al. 2010.
